# Supplementary material for: A wearable AuNP enhanced metal–organic gel (Au@MOG) sensor for sweat glucose detection with ultrahigh sensitivity
Source: Royal Society of Chemistry journal article supplement (doi:10.1039/d3nr05179j), 2023-11-27
Supplement: d3nr05179j1.pdf [file d3nr05179j1.pdf]

## Supporting information

### **Wearable AuNPs enhanced metal-organic gel (Au@MOG) sensor for sweat glucose detection with ultrahigh sensitivity**

Dengfeng Zhou<sup>a, b</sup> Shuangbin Zhang<sup>a, b</sup>, Atta Ullah Khan,<sup>a, b</sup> Lan Chen<sup>a, b</sup>,

<sup>\*</sup>, Guanglu Ge<sup>a, b, \*</sup>

<sup>a</sup> CAS Key Laboratory of Standardization and Measurement for Nanotechnology,  
CAS Center for Excellence in Nanoscience, National Center for Nanoscience and  
Technology, No. 11 Zhongguancun Beiyitiao, Beijing 100190, China

<sup>b</sup> University of Chinese Academy of Sciences, Beijing 100049, PR China

<sup>\*</sup>Authors to whom correspondence should be addressed

E-mail: E-mail: chenlan@nanoctr.cn (L. Chen) ; gegl@nanoctr.cn (G. Ge)

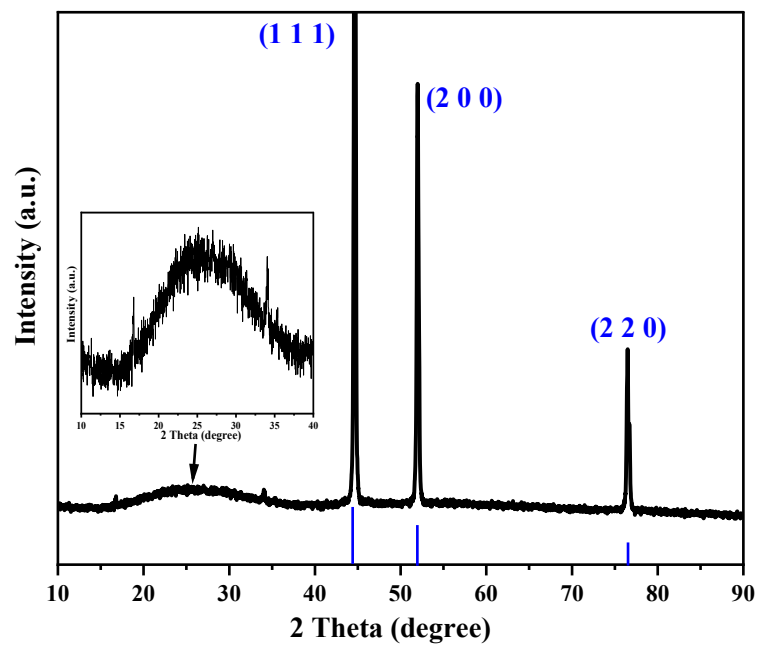

Fig. S1. XRD patterns of Au@MOG/Ni foam.

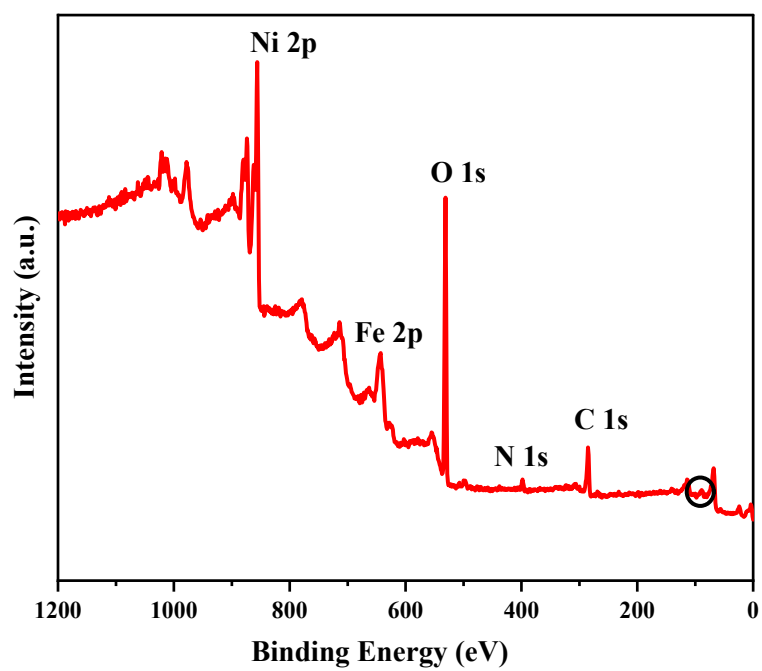

Fig. S2. Full-scan XPS spectra of Au@MOG/NF electrode.

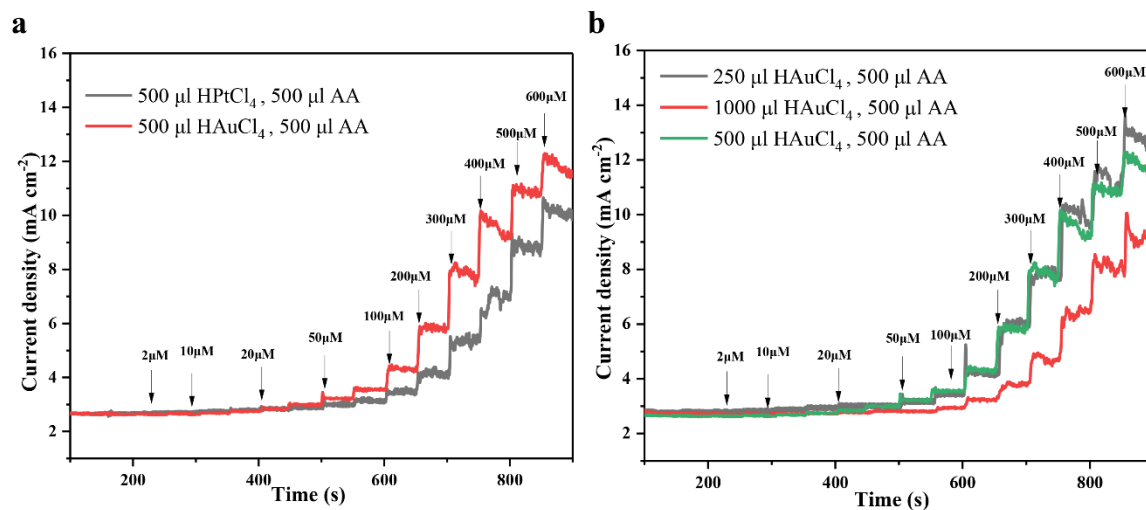

**Fig. S3.** (a) Ratio of different precious metal precursors to reducing agents (b) CA test of different types of precious metal electrodes under continuous addition of glucose.

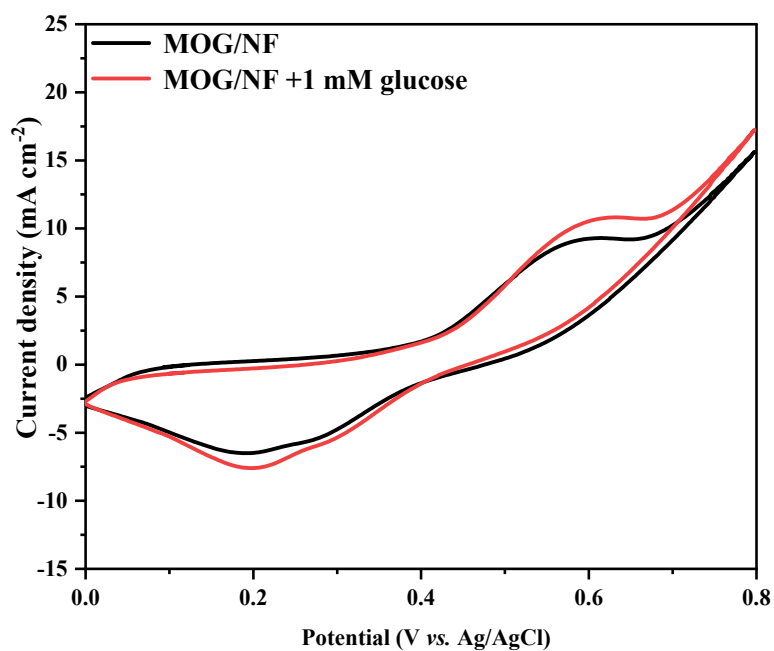

**Fig. S4.** CV in the absence and presence of 1 mM glucose with MOG/NF at a scan rate of  $50 \text{ mV s}^{-1}$ .

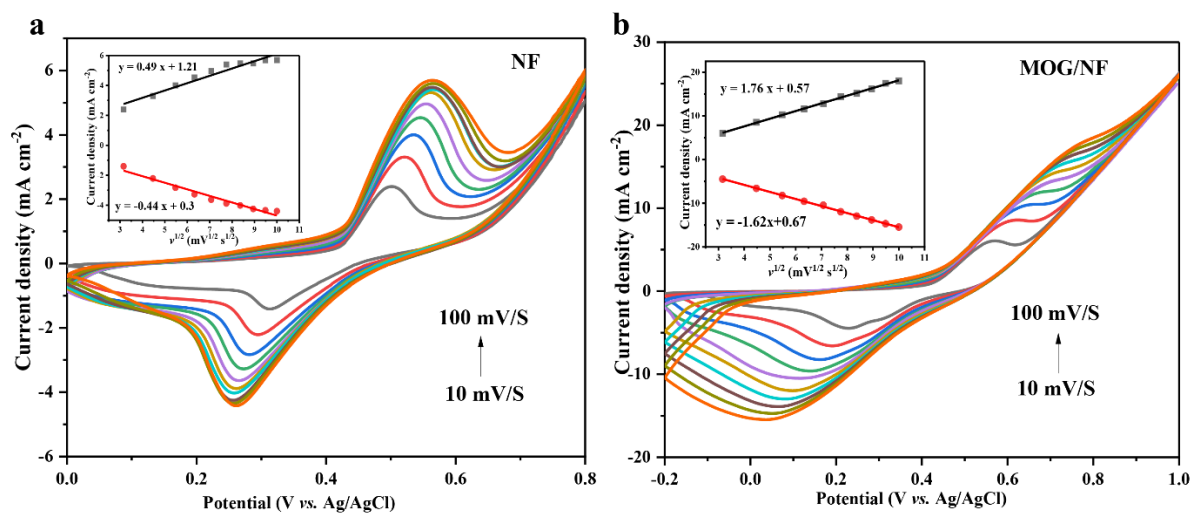

**Fig. S5.** CV curves of bare NF and MOG/NF electrode in 0.1 M NaOH in the presence of 1 mM glucose with different scan rate and the inset showed a fitting linear curve of the peak current vs. square root of scan rate.

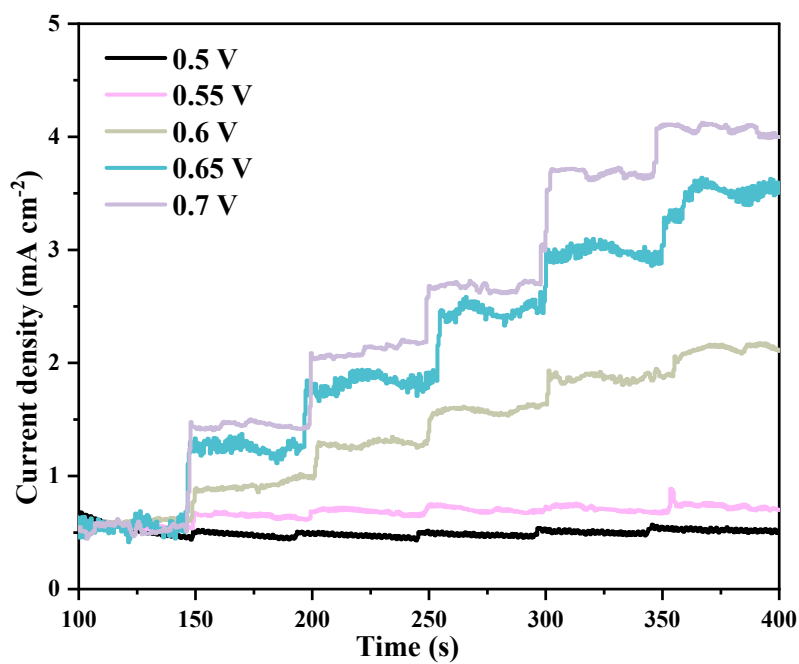

**Fig. S6.** Current response of Au@MOG/NF electrode in the different potential range.

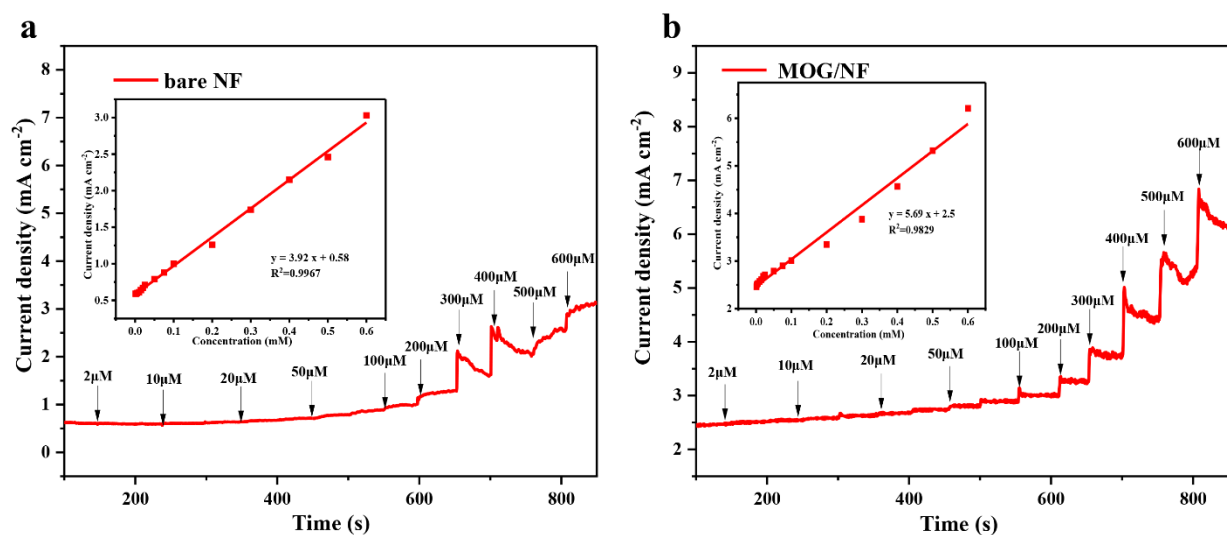

**Fig. S7.** Ampere response of (a) bare NF and (b) MOG/NF electrode continuously injecting different concentrations of glucose into 0.1 M NaOH at 0.65 V, illustrated with a calibration curve for current density versus glucose concentration.

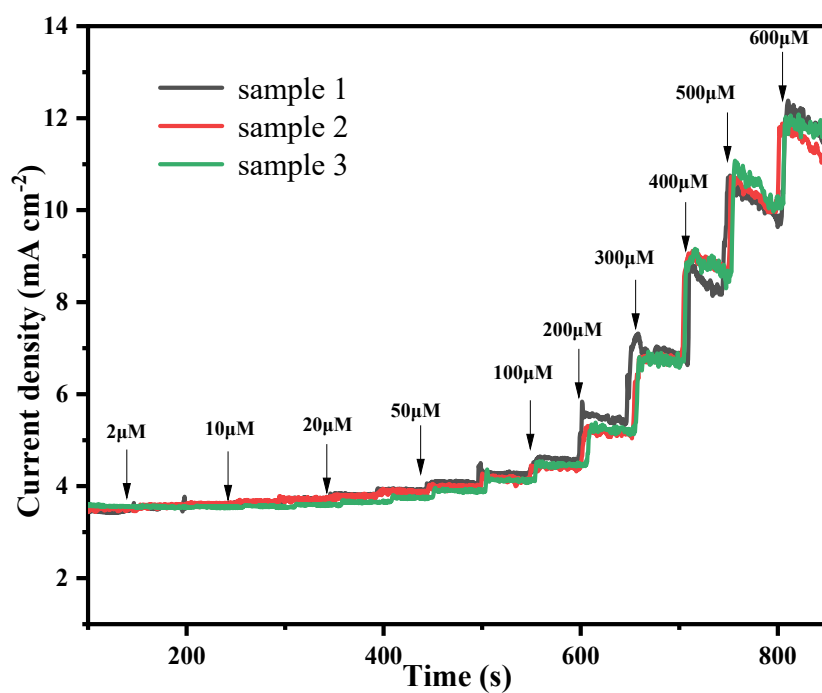

**Fig. S8.** Current responses of three batches of Au@MOG/NF electrodes were measured in 0.1 M NaOH with different glucose concentrations.

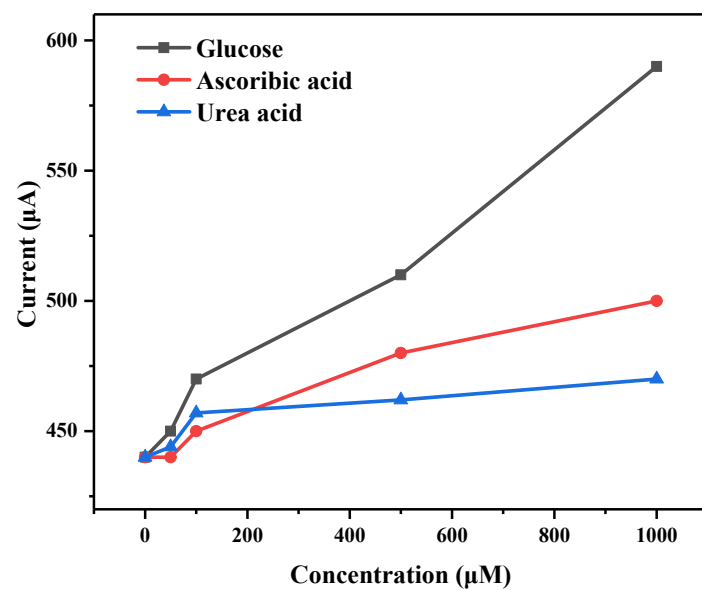

**Fig. S9.** The effect of interferences in sweat on the electrochemical signal of the sensor.
